# Supplementary material for: Age-associated DNA methylation in pediatric populations
Source: HighWire-hosted journal article supplement (doi:10.1101/gr.125187.111), 2012-02-01
Supplement: Supp_Table_Legends.pdf [file Supp_Table_Legends.pdf]

**Supplemental Table 1:** Population characteristics for the SSC and CHB pediatric groups. Race and ethnicity are self-identified.

**Supplemental Table 2:** Summary of the 2,078 SSC age-associated CpG loci.

Descriptions of each column header can be found by clicking on each columns active link.
